# Supplementary material for: Research on the development strategy of rural cultural and tourism integration from the perspective of big data Take Pingwang Town Suzhou as an example
Source: Research Square preprint supplement (doi:10.21203/rs.3.rs-3739319/v1), 2023-12-14
Supplement: Supplementary file 1 [file 1beae35fbb7c9284a777e605.xlsx]

## Sheet: Sheet1
Name	Category	Number of Comments	Distance from Miaotou Village (m)	Audience
Ying Yu Lake Ecological Park	Natural Scenery	4	10106	Parent-child
Wujiang Canal Cultural Tourism Zone	Natural Scenery	56	9422	Adults
Ying Hu Yuan	Natural Scenery	14	9011	Parent-child
Taihu Minstrel Camp	Natural Scenery	468	6990	Young people
Dalong Dang	Natural Scenery	3	5542	Adults
Pingwang Wetland Park	Park	12	10106	Parent-child
