# Supplementary material for: Research on the development strategy of rural cultural and tourism integration from the perspective of big data Take Pingwang Town Suzhou as an example
Source: Research Square preprint supplement (doi:10.21203/rs.3.rs-3739319/v1), 2023-12-14
Supplement: Supplementary file 2 [file 62c982da71771cbfb823bc6d.xlsx]

## Sheet: Sheet1
Name	Category	Number of Comments	Distance from Miaotou Village (m)	Audience
Baoen Temple	Places of Interest	133	6463	Seniors/Adults
Xiaojiuhua Temple	Places of Interest	58	9491	Seniors/Adults
Fei Xiaotong Jiangcun Memorial Hall	Places of Interest	46	4871	Parent-child
Zhaolingguan	Places of Interest	1	15339	Elderly people
Chenghuang Hall	Places of Interest	1	15333	Elderly people
