# Supplementary material for: Research on the development strategy of rural cultural and tourism integration from the perspective of big data Take Pingwang Town Suzhou as an example
Source: Research Square preprint supplement (doi:10.21203/rs.3.rs-3739319/v1), 2023-12-14
Supplement: Supplementary file 3 [file d536a523c6c50e985f212359.xlsx]

## Sheet: Sheet1
	Observations	Sense of Experience	Edibility
Emotional expression	Most beautiful (14 times), old (5 times), lively (5 times), high value (5 times), beautiful (5 times), famous (5 times), picturesque (4 times), intelligent (4 times), rich in products (3 times), fresh air (3 times), well laid out (3 times)	Beautiful (15 times), fascinating (14 times), harmonious (13 times), enjoyable (12 times), positive (12 times), like (7 times), simple (7 times), new experience (7 times), happy (7 times), warm (5 times), comfortable (5 times), happy (4 times), refreshing (4 times), unique (3 times), simple (3 times), lingering (3 times)	Delicious (7 times), tasty (7 times), high quality (7 times), fresh (6 times), fresh (5 times), nourishing (5 times), delicate (5 times), specialties (3 times), beautiful eels (2 times)
