# Supplementary material for: Research on the development strategy of rural cultural and tourism integration from the perspective of big data Take Pingwang Town Suzhou as an example
Source: Research Square preprint supplement (doi:10.21203/rs.3.rs-3739319/v1), 2023-12-14
Supplement: Supplementary file 4 [file f88e61a0e0ec430e6687f206.xlsx]

## Sheet: Sheet1
Name	Category	Number of Comments	Distance from Miaotou Village (m)	Audience
Jiangnan Water Village Leisure Farm	Picking / Nongjiale	29	5722	Parent-child/group building
Jiangcun Farmhouse	Picking / Nongjiale	18	4913	Parent-child/group building
Bifeng Farm	Picking / Nongjiale	10	7781	Adults / parent-child / group building
Huajia Chang Yangli	Picking / Nongjiale	7	859	Parent-child/group building
Xiaoqi Strawberry Picking Garden	Picking / Nongjiale	3	7796	Young people / parent-child / group building
Xiaoran Strawberry Garden	Picking / Nongjiale	2	7273	Young People / Parenting
Xueluoyang Eco-Farm in Pingwang Town	Picking / Nongjiale	2	2506	Young people / parent-child / group building
